# Supplementary material for: Discovery of Culex pipiens associated tunisia virus: a new ssRNA(+) virus representing a new insect associated virus family
Source: Oxford University Press journal article supplement (doi:10.1093/ve/vex040), 2017-12-06
Supplement: vex040_supp.pdf [file vex040_supp.pdf]

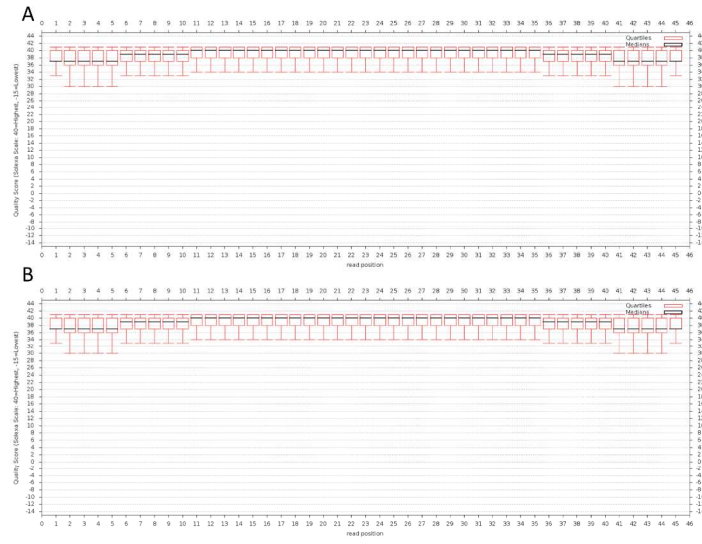

Supplementary Figure 1

Supplementary Figure 1: Distribution of quality scores using Solexa/Illumina scale along read position, for the reads mapped to the CpATV\_Ayed (panel A) and CpATV\_Jedaida (panel B) genomes after nucleotide trimming of read ends.

297x420mm (300 x 300 DPI)

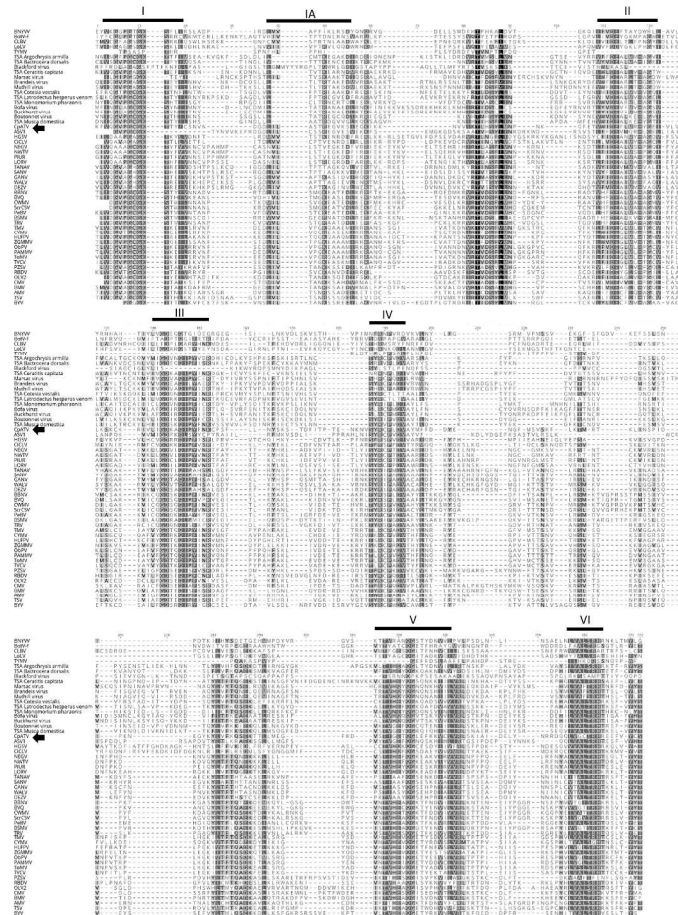

Supplementary Figure 2

Supplementary Figure 2: Alignment of conserved helicase domain of the genome of *Culex pipiens* Associated Tunisia Virus (344 aa). Taxon names are virus acronyms. Similarity in amino acids alignments is represented by shades of black (100% in black, 80% in dark gray and 60% in light gray). Arrows indicate sequences of CpATV. Conserved motifs I to VI as defined by Koonin and Dolja in 1993 are indicated above sequences (73). Sequences details and GenBank accessions numbers are available in Supplementary Table 2.

297x420mm (300 x 300 DPI)

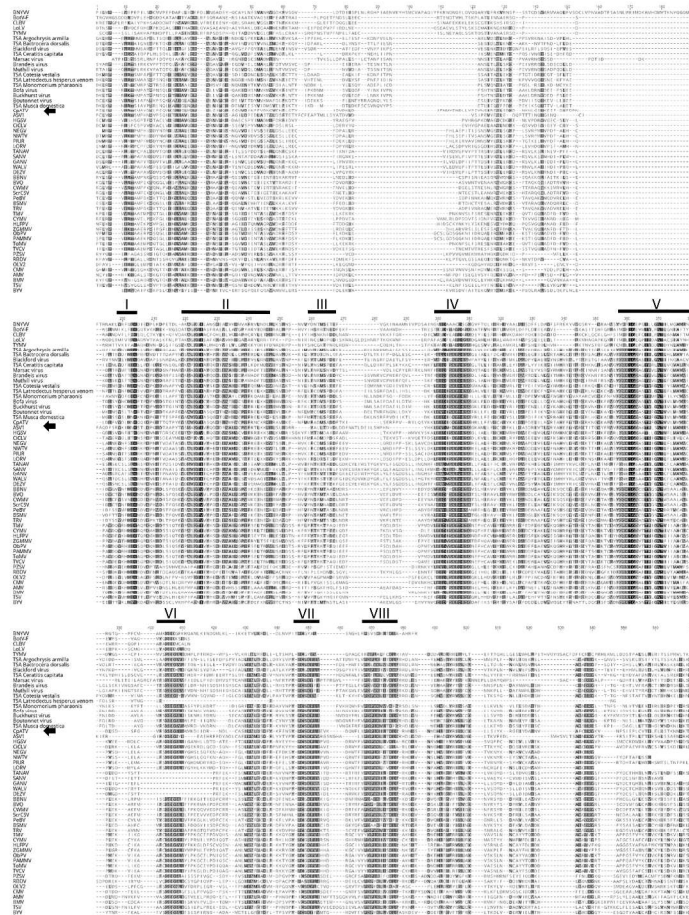

Supplementary Figure 3

Supplementary Figure 3: Alignment of conserved RNA-dependent RNA-polymerase domain of the genome of Culex pipiens Associated Tunisia Virus (597 aa). Taxon names are in acronyms. Similarity in amino acids alignments is represented by shades of black (100% in black, 80% in dark gray and 60% in light gray). Arrows indicate sequences of CpATV. Conserved motifs I to VI as defined by Koonin and Dolja in 1993 are indicated above sequences (73). Sequences details and GenBank accessions numbers are available in Supplementary Table 2.

297x420mm (300 x 300 DPI)

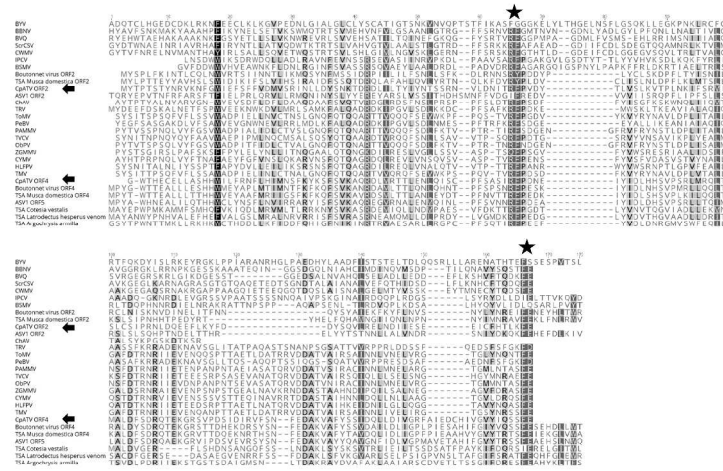

Supplementary Figure 4

Supplementary Figure 4: Alignment of conserved capsids domains of the genome of Culex pipiens Associated Tunisia Virus (218 aa). Taxon names are in acronyms. Similarity in amino acids alignments is represented by shades of black (100% in black, 80% in dark gray and 60% in light gray). Arrows indicate sequences of CpATV. Stars indicates the conserved residues as defined by Koonin and Dolja in 1993 which form a functionally important salt bridge (R(+) - E(-)) (73). Sequences details and GenBank accessions numbers are available in Supplementary Table 2.

297x420mm (300 x 300 DPI)

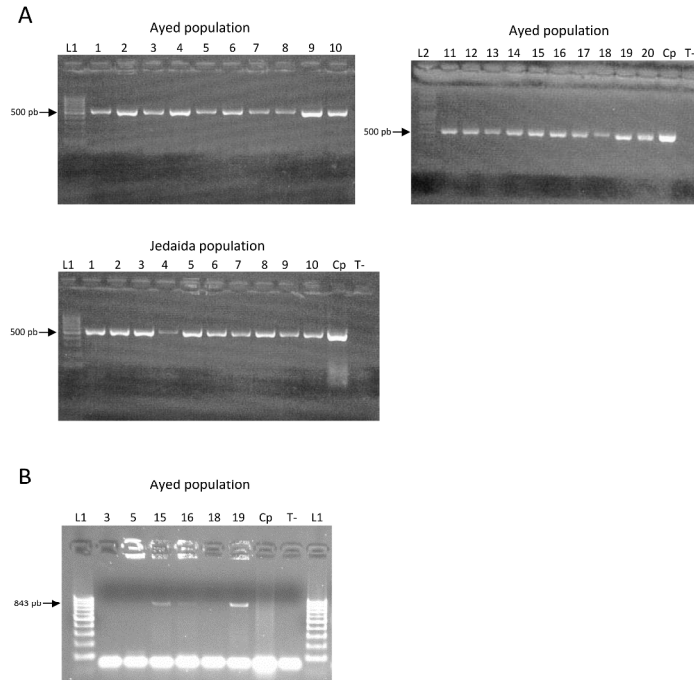

Supplementary figure 5

Supplementary Figure 5: RT-PCR detection of CpATV in wild *Culex pipiens* samples from Ayed and Jedaïda populations. A) Detection of *C. pipiens* *ace-1* gene by RT-PCR for cDNA quality control. B) CpATV detection resulted in 3 positive samples in Ayed population (samples Ayed\_15, 16 and 19), all other samples from Ayed or Jedaïda samples were negative. L1: 100 pb DNA Ladder (Jena Bioscience), L2: 100 pb DNA Ladder (Euromedex), Cp: *Culex pipiens* genomic DNA, T-: Ultrapure water.

297x420mm (300 x 300 DPI)

Supplementary Table 1: Origins and characteristics of mosquito samples.

| Culex species           | Individual name | Country        | Location                | Year      | Latitude   | Longitude   | SRA Accession number | References                       |
|-------------------------|-----------------|----------------|-------------------------|-----------|------------|-------------|----------------------|----------------------------------|
| <i>Culex pipiens</i>    | GA34I           | Algeria        | Lac des Oiseaux         | 2008      | 36.7715922 | 8.1092816   | SRX565088            | (Romiguier, <i>et al</i> , 2014) |
|                         | GA34C           | Burkina Faso   | Ouagadougou             | 1997      | 12.364637  | -1.5338639  | SRX565082            | (Romiguier, <i>et al</i> , 2014) |
|                         | GA34J           | China          | Zhu-Shang               | 2003      | 24.6446709 | 102.686988  | SRX565089            | (Romiguier, <i>et al</i> , 2014) |
|                         | GA34H           | Costa Rica     | Pueto Viero             | 2006      | 9.646168   | -82.7490229 | SRX565087            | (Romiguier, <i>et al</i> , 2014) |
|                         | GA34F           | France         | Ganges                  | 2011      | 43.934614  | 3.708787    | SRX565085            | (Romiguier, <i>et al</i> , 2014) |
|                         | GA34G           | France         | Triplet                 | 2011      | 43.629366  | 3.860393    | SRX565086            | (Romiguier, <i>et al</i> , 2014) |
|                         | GA35A           | USA            | California (lab strain) | 1950      | na         | na          | SRX1453901           | This study                       |
|                         | GA35B           | USA            | California (lab strain) | 1950      | na         | na          | SRX1453908           | This study                       |
|                         | GA34E           | Israel         | Tel Aviv Yatouch        | 2011      | 32.070065  | 34.777508   | SRX565084            | (Romiguier, <i>et al</i> , 2014) |
|                         | GA34B           | Réunion island | Saint Benoît            | 2011      | -21.043737 | 55.717857   | SRX565081            | (Romiguier, <i>et al</i> , 2014) |
|                         | GA34D           | Philippine     | Manille                 | 2003      | 14.5995124 | 120.9842195 | SRX565083            | (Romiguier, <i>et al</i> , 2014) |
|                         | GA34A           | Tunisia        | Grombalia               | 2005      | 36.601541  | 10.50034    | SRX565080            | (Romiguier, <i>et al</i> , 2014) |
|                         | GA35C *         | Tunisia        | Ayed                    | 2005      | 35.626433  | 10.912933   | SRX1457280           | This study                       |
|                         | GA35D           | Tunisia        | Grombalia               | 2005      | 36.590900  | 10.490600   | SRX1457281           | This study                       |
|                         | GA35E *         | Tunisia        | Jedaida                 | 2011      | 36.803817  | 9.942400    | SRX1457282           | This study                       |
|                         | GA35F           | Tunisia        | Kef2                    | 2008      | 36.159550  | 8.718633    | SRX1457496           | This study                       |
| GA35G                   | Tunisia         | Azib           | 2011                    | 37.222633 | 9.934417   | SRX1457498  | This study           |                                  |
| GA35H                   | Tunisia         | Utique         | 2011                    | 37.069600 | 10.007067  | SRX1457500  | This study           |                                  |
| <i>Culex hortensis</i>  | GA34K           | France         | Laroque                 | 2011      | 43.922663  | 3.723849    | SRX565078            | (Romiguier, <i>et al</i> , 2014) |
|                         | GA34L           | France         | Mas de Foiton           | 2004      | 43.796794  | 4.593698    | SRX565079            | (Romiguier, <i>et al</i> , 2014) |
| <i>Culex torrentium</i> | GA34M           | France         | Polignac                | 1996      | 45.071348  | 3.859441    | SRX565090            | (Romiguier, <i>et al</i> , 2014) |
|                         | GA34N           | Sweden         | Uppsala                 | 1994      | 59.8585638 | 17.6389267  | SRX565091            | (Romiguier, <i>et al</i> , 2014) |

\*Individuals with a full-length viral genome detected

Romiguier J, Lourenco J, Gayral P, Faivre N, Weinert LA, Ravel S, Ballenghien M, Cahais V, Bernard A, Loire E, Keller L, Galtier N. 2014. Population genomics of eusocial insects: the costs of a vertebrate-like effective population size. *J. Evol. Biol.* **27**:593–603.

Supplementary Table 2: Mosquitoes genomic and transcriptomic sequence data used in this study.

| BioProject Accession | ID     | Project Name                                                                                  | Type of data             | Taxonomic ID | Scientific Name               | Availability        |
|----------------------|--------|-----------------------------------------------------------------------------------------------|--------------------------|--------------|-------------------------------|---------------------|
| PRJNA29017           | 29017  | Reference sequences (RefSeq) of the <i>Culex quinquefasciatus</i> genome                      | Genome and transcriptome | 7176         | <i>Culex quinquefasciatus</i> | Release April 2014* |
| PRJNA18751           | 18751  | The vector for <i>West Nile Virus</i>                                                         | Genome                   | 7176         | <i>Culex quinquefasciatus</i> |                     |
| PRJNA246260          | 246260 | <i>Culex pipiens pallens</i> and <i>C. p. quinquefasciatus</i> with different resistant level | Transcriptome            | 7176         | <i>Culex quinquefasciatus</i> | SRR1271734          |
|                      |        |                                                                                               |                          | 7176         | <i>Culex quinquefasciatus</i> | SRR1271735          |
|                      |        |                                                                                               |                          | 7176         | <i>Culex quinquefasciatus</i> | SRR1271736          |
|                      |        |                                                                                               |                          | 7176         | <i>Culex quinquefasciatus</i> | SRR1271737          |
|                      |        |                                                                                               |                          | 42434        | <i>Culex pipiens pallens</i>  | SRR1271738          |
|                      |        |                                                                                               |                          | 42434        | <i>Culex pipiens pallens</i>  | SRR1271739          |
|                      |        |                                                                                               |                          | 42434        | <i>Culex pipiens pallens</i>  | SRR1271740          |
|                      |        |                                                                                               |                          | 42434        | <i>Culex pipiens pallens</i>  | SRR1271741          |
|                      |        |                                                                                               |                          | 42434        | <i>Culex pipiens pallens</i>  | SRR1271742          |
|                      |        |                                                                                               |                          | 42434        | <i>Culex pipiens pallens</i>  | SRR1271743          |
|                      |        |                                                                                               |                          | 42434        | <i>Culex pipiens pallens</i>  | SRR1271744          |
|                      |        |                                                                                               |                          | 7176         | <i>Culex quinquefasciatus</i> | SRR1271745          |
| PRJNA253629          | 253629 | RNA-sequencing of <i>Culex pipiens molestus</i> and <i>C. pipiens quinquefasciatus</i>        | Transcriptome            | 7176         | <i>Culex quinquefasciatus</i> | SRR1462324          |
|                      |        |                                                                                               |                          | 233155       | <i>Culex pipiens molestus</i> | SRR1462325          |

\*[http://www.broadinstitute.org/annotation/genome/culex\\_pipiens](http://www.broadinstitute.org/annotation/genome/culex_pipiens)

Supplementary Table 3: *Plasmodium* genomes available in PlasmoDB (release 2015/07/23)

| <b><i>Plasmodium</i> species</b> | <b>Genome version</b> |
|----------------------------------|-----------------------|
| <i>P. berghei</i> ANKA           | 2013/03/01            |
| <i>P. chabaudi chabaudi</i>      | 2013/03/01            |
| <i>P. coatneyi hackeri</i>       | 2014/07/21            |
| <i>P. cynomolgi</i> strain B     | 2012/09/19            |
| <i>P. falciparum</i> 3D7         | 2013/03/01            |
| <i>P. falciparum</i> IT          | 2013/03/01            |
| <i>P. gallinaceum</i> 8A         | 2006/12/31            |
| <i>P. knowlesi</i> strain H      | 2013/03/01            |
| <i>P. reichenowi</i> CDC         | 2014/09/03            |
| <i>P. vivax</i> Sal-1            | 2015/05/01            |
| <i>P. yoelii yoelii</i> 17X      | 2014/02/01            |
| <i>P. yoelii yoelii</i> 17XNL    | 2005/09/01            |
| <i>P. yoelii yoelii</i> YM       | 2013/03/01            |



Supplementary Table 4: Summary statistics (means for each species) of transcriptome assembly quality, ORF prediction and viral homology search.

| Genus                                               | <i>Culex</i>   |                  |                   |
|-----------------------------------------------------|----------------|------------------|-------------------|
| Species                                             | <i>pipiens</i> | <i>hortensis</i> | <i>torrentium</i> |
| No. of transcriptomes analyzed                      | 18             | 2                | 2                 |
| <b>Initial assembly (ABYSS)</b>                     |                |                  |                   |
| No. million reads                                   | 25.6           | 54.9             | 58.3              |
| No. contigs (x 1000)                                | 27.2           | 73.8             | 90.2              |
| Median length                                       | 52             | 52               | 51                |
| N50                                                 | 69             | 54               | 52                |
| <b>Final assembly (ABYSS-CAP3)</b>                  |                |                  |                   |
| No. contigs (x 1000)                                | 3.4            | 8.3              | 7.9               |
| Median length                                       | 122            | 118              | 122               |
| N50                                                 | 233            | 196              | 238               |
| <b>Virus detection</b>                              |                |                  |                   |
| No. of ORF predicted per species (x 1000)           | 2.6            | 6.0              | 5.8               |
| No. of transcriptomes with full-length viral genome | <b>2</b>       | 0                | 0                 |

Supplementary Table 5: Fixed mutations distinguishing CpATV\_Ayed and CpATV\_Jedaïda genomes.

| ORF                  | Genomic Region | Mutation number | Position on CpATV_Ayed | Nucleotide in CpATV_Ayed | Position on CpATV_Jedaïda | Nucleotide in CpATV_Jedaïda | Mutation Type        | Consequence of mutation | Amino acid changes  |
|----------------------|----------------|-----------------|------------------------|--------------------------|---------------------------|-----------------------------|----------------------|-------------------------|---------------------|
| 5' non-coding region | -              | 1               | 1                      | C                        | -                         | -                           | Insertion / Deletion | -                       | -                   |
|                      |                | 2               | 2                      | C                        | -                         | -                           | Insertion / Deletion | -                       | -                   |
|                      |                | 3               | 3                      | T                        | -                         | -                           | Insertion / Deletion | -                       | -                   |
|                      |                | 4               | 110                    | C                        | 107                       | T                           | Transition           | -                       | -                   |
| ORF 1                | No domain      | 5               | 498                    | C                        | 495                       | T                           | Transition           | Synonymous              | AGC (S) <-> AGT (S) |
|                      | Viral Helicase | 6               | 765                    | G                        | 762                       | T                           | Transversion         | Synonymous              | TCG (S) <-> TCG (S) |
|                      |                | 7               | 1,014                  | C                        | 1,011                     | T                           | Transition           | Synonymous              | GTC (V) <-> GTT (V) |
|                      | No domain      | 8               | 1,497                  | A                        | 1,494                     | G                           | Transition           | Synonymous              | CCA (P) <-> CCG (P) |
|                      |                | 9               | 1,608                  | C                        | 1,605                     | T                           | Transition           | Synonymous              | TTC (F) <-> TTT (F) |
|                      |                | 10              | 1,699                  | A                        | 1,696                     | C                           | Transversion         | Synonymous              | AGA (R) <-> CGA (R) |
|                      | RdRp           | 11              | 2,079                  | T                        | 2,076                     | A                           | Transversion         | Synonymous              | ATT (I) <-> ATA (I) |
| 12                   |                | 2,580           | T                      | 2,577                    | A                         | Transversion                | Synonymous           | CTT (L) <-> CTA (L)     |                     |
| 13                   |                | 2,739           | T                      | 2,736                    | C                         | Transition                  | Synonymous           | GCT (A) <-> GCC (A)     |                     |
| Intergenic region    | -              | 14              | 4,025                  | -                        | 4,022                     | T                           | Insertion / Deletion | -                       | -                   |
| ORF3                 | Signal peptide | 15              | 4,111                  | T                        | 4,109                     | C                           | Transition           | Non-synonymous          | TTT (F) <-> CTT (L) |
|                      | No domain      | 16              | 4,377                  | G                        | 4,375                     | A                           | Transition           | Synonymous              | TTG (L) <-> TTG (L) |
|                      |                | 17              | 4,410                  | T                        | 4,408                     | C                           | Transition           | Synonymous              | TAT (Y) <-> TAC (Y) |
|                      |                | 18              | 4,467                  | G                        | 4,465                     | A                           | Transition           | Synonymous              | ACG (T) <-> ACA (T) |
|                      |                | 19              | 4,607                  | G                        | 4,605                     | A                           | Transition           | Non-synonymous          | AGA (R) <-> AAA (K) |
|                      |                | 20              | 5,083                  | A                        | 5,081                     | G                           | Transition           | Non-synonymous          | AAA (K) <-> GAA (E) |
|                      | MSP7_C         | 21              | 5,117                  | C                        | 5,115                     | T                           | Transition           | Non-synonymous          | CCT (P) <-> CTT (L) |
|                      |                | 22              | 5,598                  | G                        | 5,596                     | A                           | Transition           | Synonymous              | AAG (K) <-> AAA (K) |
|                      |                | 23              | 5,803                  | G                        | 5,801                     | A                           | Transition           | Non-synonymous          | GTT (V) <-> ATT (I) |
|                      |                | 24              | 5,964                  | T                        | 5,962                     | C                           | Transition           | Synonymous              | ATT (I) <-> ATC (I) |
| 25                   |                | 6,072           | C                      | 6,070                    | T                         | Transition                  | Synonymous           | AAC (N) <-> AAT (N)     |                     |
| ORF 4                | Capsid         | 26              | 6,416                  | C                        | 6,414                     | T                           | Transition           | Synonymous              | GCC (A) <-> GCT (A) |

Supplementary Table 6: Details of viruses and viral sequences used in ORF1 (helicase and RNA-dependant RNA polymerase) and ORF2-ORF4 (capsids) phylogenies.

| <b>Acronyme</b> | <b>Complete virus name</b>                  | <b>Viral Family</b>             | <b>Viral Genus</b>    | <b>Genbank Accession</b>  | <b>Host</b>                |
|-----------------|---------------------------------------------|---------------------------------|-----------------------|---------------------------|----------------------------|
| <b>AMV</b>      | <i>Alfalfa mosaic virus</i>                 | Bromoviridae                    | <i>Alfavirus</i>      | NC_002024, NC_001495      | Plant                      |
| <b>ASV1</b>     | Adelphocoris suturalis-associated virus 1   | Not assigned                    | Not assigned          | KX966285                  | Hemiptera                  |
| <b>BBNV</b>     | <i>Broad bean necrosis virus</i>            | Virgaviridae                    | <i>Pomovirus</i>      | D86636, D86637            | Plant                      |
|                 | Blackford Virus                             | Not assigned                    | Not assigned          | KU754514                  | Drosophilidae (Diptera)    |
| <b>BMV</b>      | <i>Brome mosaic virus</i>                   | Bromoviridae                    | <i>Bromovirus</i>     | NC_002027, KU726253       | Plant                      |
| <b>BNRBV</b>    | <i>Blueberry necrotic ring blotch virus</i> | Not assigned                    | <i>Blunervirus</i>    | NC_016084, NC_016085      | Plant                      |
| <b>BNYVV</b>    | <i>Beet necrotic yellow vein virus</i>      | Benyviridae                     | <i>Benyvirus</i>      | NC_003514                 | Plant                      |
|                 | Bofa Virus                                  | Not assigned                    | Not assigned          | KU754515                  | Drosophilidae (Diptera)    |
| <b>BotV-F</b>   | <i>Botrytis virus F</i>                     | Gammaflexiviridae (Tymovirales) | <i>Mycoflexivirus</i> | NC_004063                 | Fungi                      |
|                 | Boutonnet Virus                             | Not assigned                    | Not assigned          | KU754539                  | Drosophilidae (Diptera)    |
|                 | Brandeis Virus                              | Not assigned                    | Not assigned          | (1)                       | Drosophilidae (Diptera)    |
| <b>BSMV</b>     | <i>Barley stripe mosaic virus</i>           | Virgaviridae                    | <i>Hordeivirus</i>    | MBSRNAGT, MBSARNA, X03854 | Plant                      |
|                 | Buckhurst Virus                             | Not assigned                    | Not assigned          | KU754516                  | Drosophilidae (Diptera)    |
| <b>BVQ</b>      | <i>Beet virus Q</i>                         | Virgaviridae                    | <i>Pomovirus</i>      | AJ223596, AJ223597        | Plant                      |
| <b>BYV</b>      | <i>Beet yellows virus</i>                   | Closteroviridae                 | <i>Closterovirus</i>  | NC_001598                 | Plant                      |
| <b>ChAV</b>     | <i>Chara australis virus</i>                | Not assigned                    | Not assigned          | JF824737                  | Plant                      |
| <b>CiCLV</b>    | <i>Citrus leprosis virus C</i>              | Not assigned                    | <i>Cilevirus</i>      | DQ157466                  | Plant (mites transmitted)  |
| <b>CLBV</b>     | <i>Citrus leaf blotch virus</i>             | Betaflexiviridae (Tymovirales)  | <i>Citivirus</i>      | NC_003877                 | Plant                      |
| <b>CMV</b>      | <i>Cucumber mosaic virus</i>                | Bromoviridae                    | <i>Cucumovirus</i>    | NC_002035, KC019299       | Plant                      |
| <b>CWMV</b>     | <i>Chinese wheat mosaic virus</i>           | Virgaviridae                    | <i>Furovirus</i>      | AJ012005, AJ012006        | Plant                      |
| <b>CYMV</b>     | <i>Clitoria yellow mottle virus</i>         | Virgaviridae                    | <i>Tobamovirus</i>    | NC_016519                 | Plant                      |
| <b>DEZV</b>     | <i>Dezidougou virus</i>                     | Not assigned                    | Sandewavirus          | JQ675604                  | Insect (Diptera-Culicidae) |
| <b>GANV</b>     | <i>Goutanap virus</i>                       | Not assigned                    | Sandewavirus          | KF588035                  | Insect (Diptera-Culicidae) |

|               |                                          |                                    |                    |                      |                            |
|---------------|------------------------------------------|------------------------------------|--------------------|----------------------|----------------------------|
| <b>HGSV</b>   | <i>Hibiscus green spot virus</i>         | Not assigned                       | <i>Higrevirus</i>  | HQ852052             | Plant                      |
| <b>HLFPV</b>  | <i>Hibiscus latent Fort Pierce virus</i> | Virgaviridae                       | <i>Tobamovirus</i> | FJ196834, AY250831   | Plant                      |
| <b>IPCV</b>   | <i>Indian peanut clump virus</i>         | Virgaviridae                       | <i>Pecluvirus</i>  | AF447397             | Plant                      |
| <b>LoLV</b>   | <i>Lolium latent virus</i>               | Alphaflexiviridae<br>(Tymovirales) | <i>Lolavirus</i>   | NC_010434            | Plant                      |
| <b>LORV</b>   | <i>Loreto virus</i>                      | Not assigned                       | Nelorpivirus       | JQ675611             | Insect (Diptera-Culicidae) |
|               | Marsac Virus                             | Not assigned                       | Not assigned       | KU754518             | Drosophilidae (Diptera)    |
|               | Muthill Virus                            | Not assigned                       | Not assigned       | KU754517             | Drosophilidae (Diptera)    |
| <b>NWTV</b>   | <i>Ngewotan virus</i>                    | Not assigned                       | Nelorpivirus       | JQ686833             | Insect (Diptera-Culicidae) |
| <b>NEGV</b>   | <i>Negev virus</i>                       | Not assigned                       | Nelorpivirus       | JQ675608             | Insect (Diptera-Culicidae) |
| <b>ObPV</b>   | <i>Obuda pepper virus</i>                | Virgaviridae                       | <i>Tobamovirus</i> | MTVGRNA              | Plant                      |
| <b>OLV-2</b>  | <i>Olive latent virus 2</i>              | Bromoviridae                       | <i>Oleavirus</i>   | NC_003674, NC_003673 | Plant                      |
| <b>PAMMV</b>  | <i>Paprika mild mottle virus</i>         | Virgaviridae                       | <i>Tobamovirus</i> | AB089381             | Plant                      |
| <b>PCV</b>    | <i>Peanut clump virus</i>                | Virgaviridae                       | <i>Pecluvirus</i>  | X78602               | Plant                      |
| <b>PeBV</b>   | <i>Pea early browning virus</i>          | Virgaviridae                       | <i>Tobravirus</i>  | X14006, X15883       | Plant                      |
| <b>PIUR</b>   | <i>Piura virus</i>                       | Not assigned                       | Nelorpivirus       | JQ675607             | Insect (Diptera-Culicidae) |
| <b>PZSV</b>   | <i>Pelargonium zonate spot virus</i>     | Bromoviridae                       | <i>Anulavirus</i>  | NC_003650, AJ272327  | Plant                      |
| <b>RBDV</b>   | <i>Raspberry bushy dwarf virus</i>       | Not assigned                       | <i>Idaeovirus</i>  | NC_003739            | Plant                      |
| <b>SANV</b>   | <i>Santana virus</i>                     | Not assigned                       | Sandewavirus       | JQ675606             | Insect (Diptera-Culicidae) |
| <b>ScrCSV</b> | <i>Sorghum chlorotic spot virus</i>      | Virgaviridae                       | <i>Furovirus</i>   | AB033691, AB033692   | Plant                      |
| <b>TANAV</b>  | <i>Tanay virus</i>                       | Not assigned                       | Sandewavirus       | KF425261             | Insect (Diptera-Culicidae) |
|               | <i>TSA Argochrysis armilla</i>           | Not assigned                       | Not assigned       | GAXO01029871         | Unannotated virus-like (2) |
|               | <i>TSA Bactrocera dorsalis</i>           | Not assigned                       | Not assigned       | GAKP01015888         | Unannotated virus-like (2) |
|               | <i>TSA Ceratitis capitata</i>            | Not assigned                       | Not assigned       | GAMC01007262         | Unannotated virus-like (2) |
|               | <i>TSA Cotesia vestalis</i>              | Not assigned                       | Not assigned       | GAKG01005025         | Unannotated virus-like (2) |
|               | <i>TSA Latrodectus hesperus</i> venom    | Not assigned                       | Not assigned       | GBCS01005187         | Unannotated virus-like (2) |
|               | <i>TSA Monomorium pharaonis</i>          | Not assigned                       | Not assigned       | LA822010             | Unannotated virus-like (2) |
|               | <i>TSA Musca domestica</i>               | Not assigned                       | Not assigned       | GARN01041480         | Unannotated virus-like (2) |
| <b>TMV</b>    | <i>Tobacco mosaic virus</i>              | Virgaviridae                       | <i>Tobamovirus</i> | V01408               | Plant                      |

|              |                                                                 |                              |                     |                       |                            |
|--------------|-----------------------------------------------------------------|------------------------------|---------------------|-----------------------|----------------------------|
| <b>ToMV</b>  | <i>Tomato mosaic virus</i>                                      | Virgaviridae                 | <i>Tobamovirus</i>  | X02144                | Plant                      |
| <b>TRV</b>   | <i>Tobacco rattle virus</i>                                     | Virgaviridae                 | <i>Tobravirus</i>   | AF166084, AF034621    | Plant                      |
| <b>TSV</b>   | <i>Tobacco streak virus</i>                                     | Bromoviridae                 | <i>Ilarvirus</i>    | NC_003842, FJ561302   | Plant                      |
| <b>TVCV</b>  | <i>Turnip vein-clearing virus</i>                               | Virgaviridae                 | <i>Tobamovirus</i>  | BRU03387              | Plant                      |
| <b>TYMV</b>  | <i>Turnip yellow mosaic virus</i>                               | Tymoviridae<br>(Tymovirales) | <i>Tymovirus</i>    | NC_004063             | Plant                      |
| <b>WALV</b>  | <i>Wallerfield virus</i>                                        | Not assigned                 | <i>Sandewavirus</i> | KF042857              | Insect (Diptera-Culicidae) |
| <b>ZGMMV</b> | <i>Zucchini green mottle mosaic virus</i>                       | Virgaviridae                 | <i>Tobamovirus</i>  | AJ295949              | Plant                      |
| <b>CpATV</b> | <i>Culex pipiens</i> Associated Tunisia<br>Virus strain Ayed    | Not assigned                 | Not assigned        | MG457154 (This study) | Insect (Diptera-Culicidae) |
| <b>CpATV</b> | <i>Culex pipiens</i> Associated Tunisia<br>Virus strain Jedaida | Not assigned                 | Not assigned        | MG457155 (This study) | Insect (Diptera-Culicidae) |

1. **Webster CL, Waldron FM, Robertson S, Crowson D, Ferrari G, Quintana JF, Brouqui J-M, Bayne EH, Longdon B, Buck AH, Lazzaro BP, Akorli J, Haddrill PR, Obbard DJ.** 2015. The discovery, distribution, and evolution of viruses associated with *Drosophila melanogaster*. PLoS Biol. **13**:e1002210.
2. **Webster C, Longdon B, Lewis S, Obbard D.** 2016. Twenty-five new viruses associated with the Drosophilidae (Diptera). Evol. Bioinforma. **13**.
